# Supplementary material for: Substrate Structured Bournonite CuPbSbS3 Thin Film Solar Cells
Source: MDPI journal article supplement (doi:10.3390/cryst13081256), 2023-08-15
Supplement: s1 [file s1]

Archive with 1 entries (1 files):
- crystals-2503903-supplementary.pdf
