# Supplementary material for: Substrate Structured Bournonite CuPbSbS3 Thin Film Solar Cells
Source: MDPI journal article supplement (doi:10.3390/cryst13081256), 2023-08-15
Supplement: s1 [file s1 › crystals-2503903-supplementary.pdf]

# Substrate Structured Bournonite $\text{CuPbSbS}_3$ Thin Film Solar Cells

Limei Lin <sup>1,2,\*</sup>, Rui Da <sup>1,2</sup>, Chenqi Zheng <sup>1,2</sup>, Ruibo Zeng <sup>1,2</sup> and Junda Ding <sup>1,2</sup>

1. Fujian Provincial Engineering Technology Research Center of Solar Energy Conversion and Energy Storage, College of Physics and Energy, Fujian Normal University, Fuzhou, 350117, China.
2. Fujian Provincial Collaborative Innovation Center for Advanced High-Field Superconducting Materials and Engineering, Fuzhou, 350117, China.

\*Correspondence: [linlm@fjnu.edu.cn](mailto:linlm@fjnu.edu.cn) (L.L.)

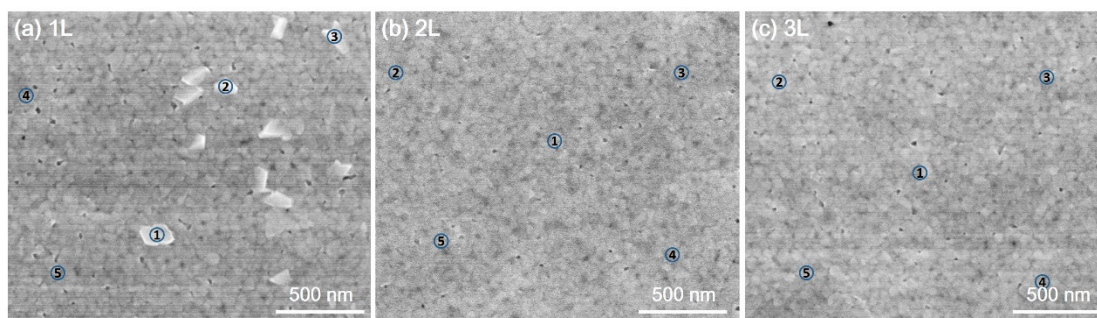

Figure S1. SEM images of  $\text{CuPbSbS}_3$  films for EDS test: (a) 1 layer (1L), (b) 2 layers (2L) and (c) 3 layers (3L).

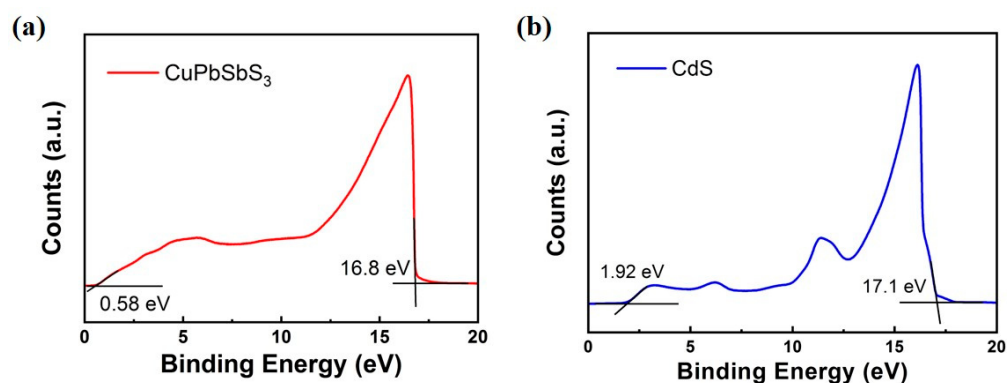

Figure S2. UPS results of (a)  $\text{CuPbSbS}_3$  and (b) CdS thin films.

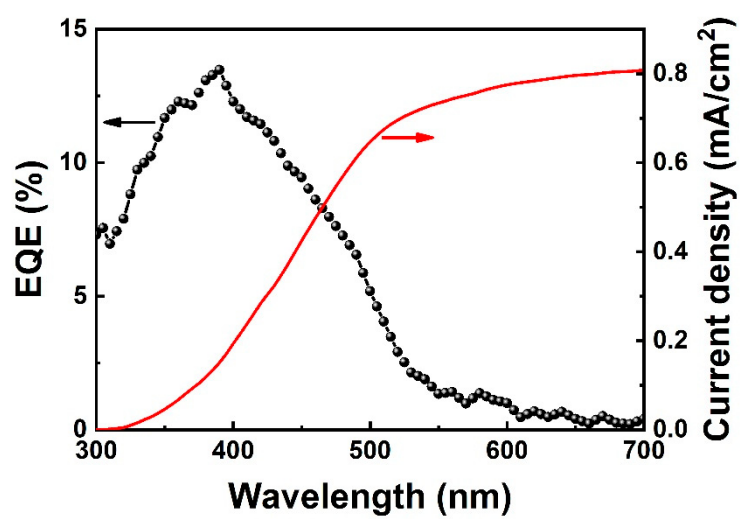

Figure S3. EQE spectrum of CuPbSbS<sub>3</sub> thin film solar cell.

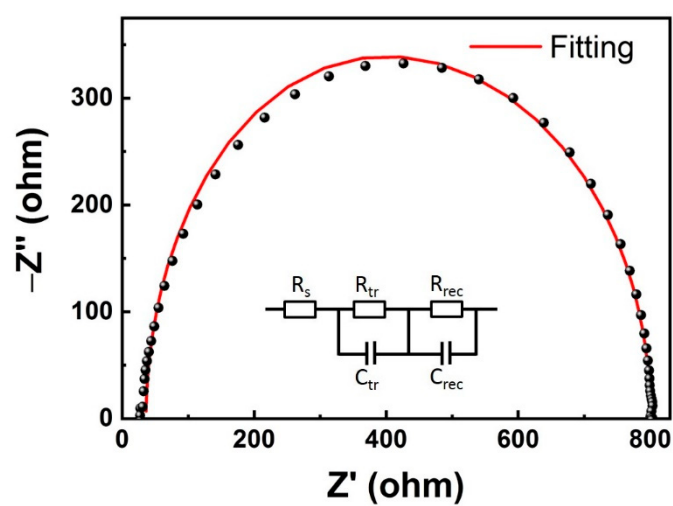

Figure S4. Electrochemical impedance spectroscopy measurement of CuPbSbS<sub>3</sub> thin film solar cell (inset equivalent circuit diagram).

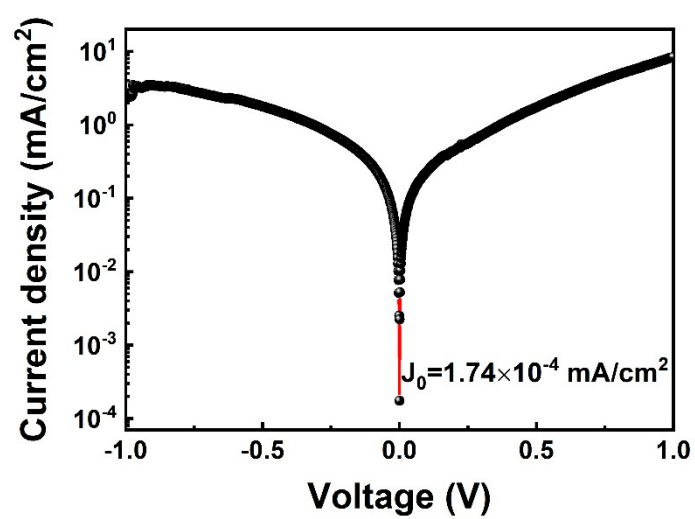

Figure S5. Dark J-V characteristic of CuPbSbS<sub>3</sub> thin film solar cell.

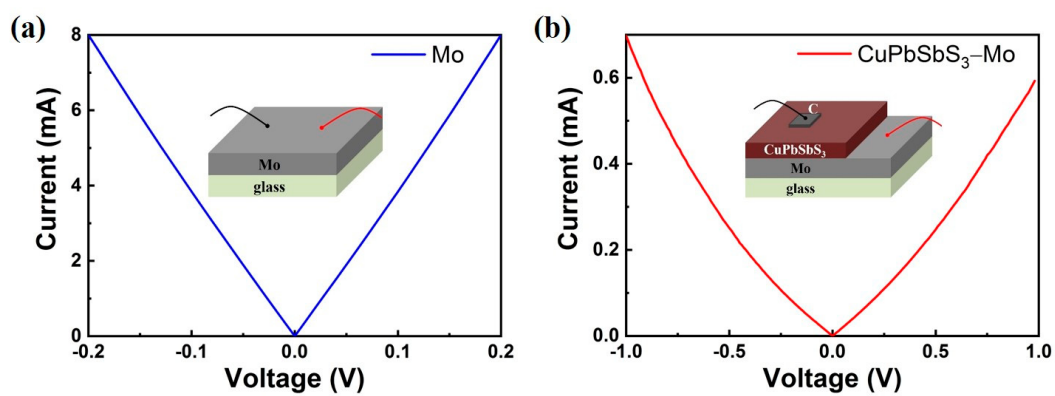

Figure S6. I-V Curves of (a) Mo and (b) CuPbSbS<sub>3</sub>/Mo structures (inset resistance test modes).
